# Supplementary figures and images for: Histomolecular Features of a Rare Subtype of Pleomorphic Adenoma Characterised by Abundant Lymphoid Stroma and HMGA2 Rearrangements
Source: Springer Nature journal article supplement (doi:10.1007/s12105-025-01872-1), 2025-12-29

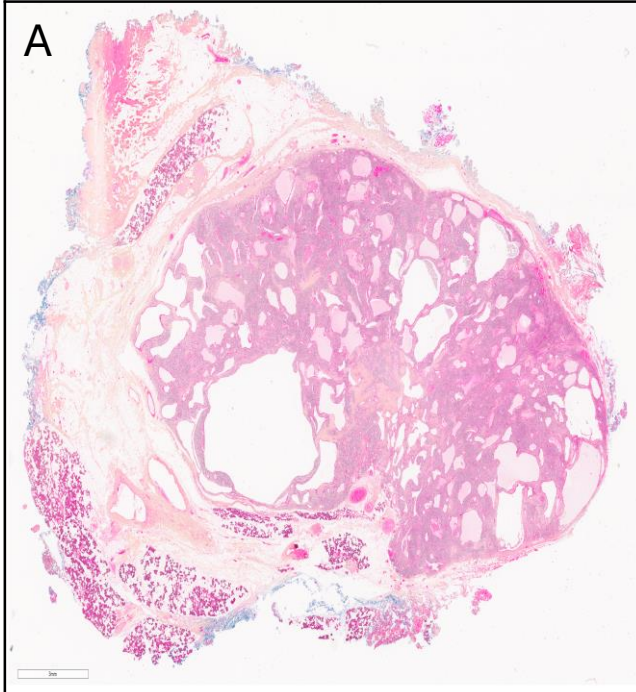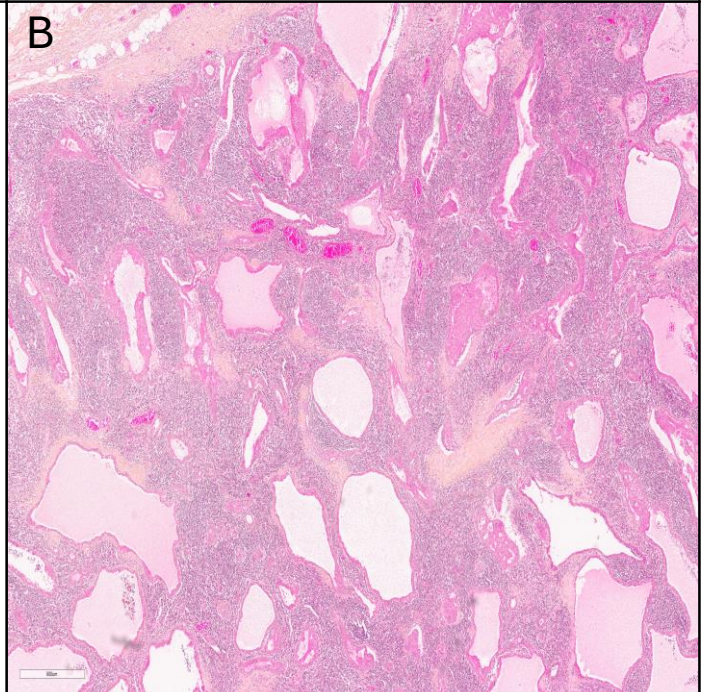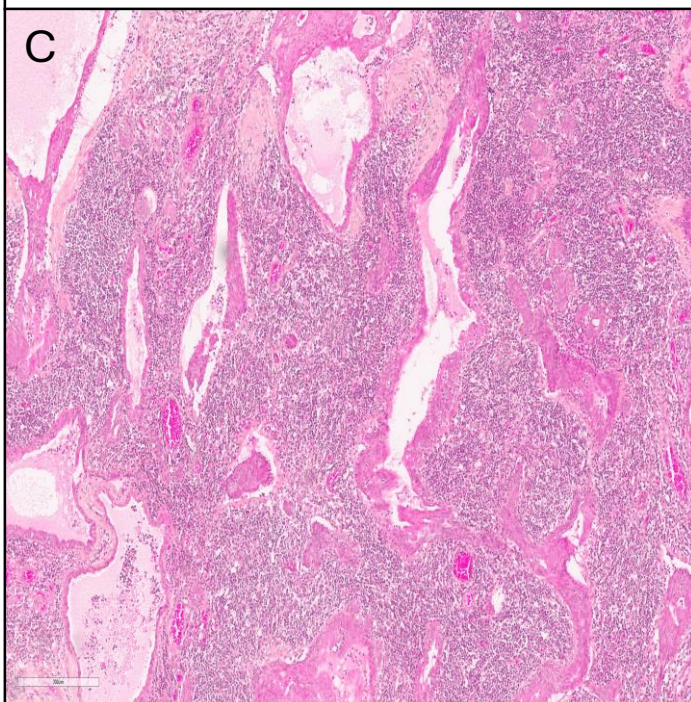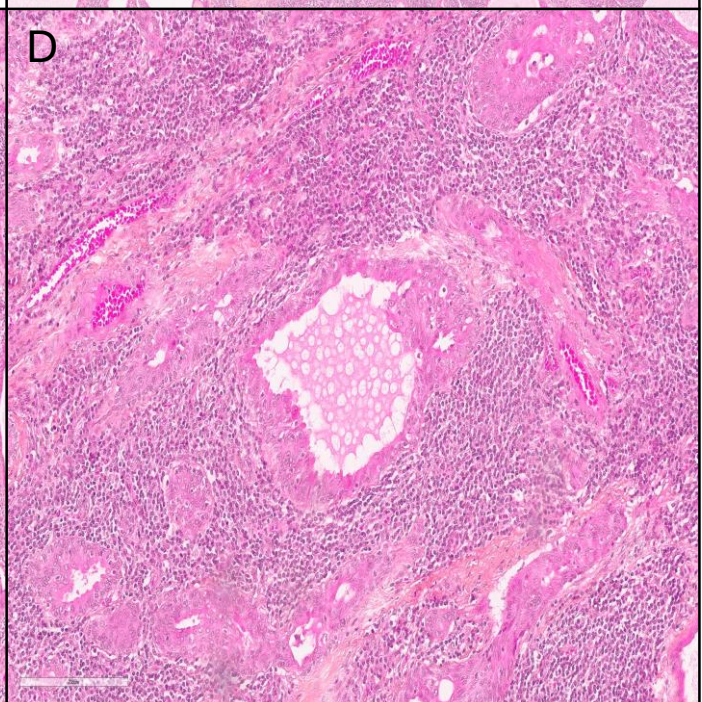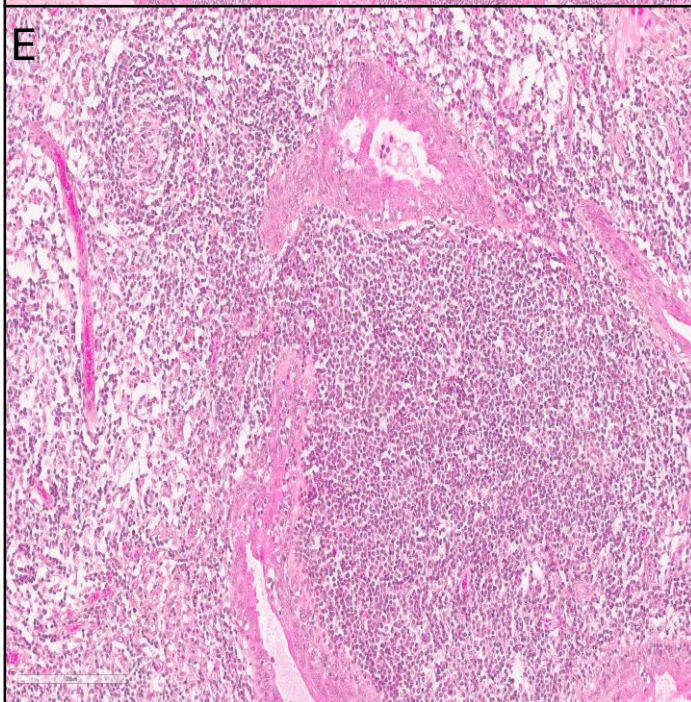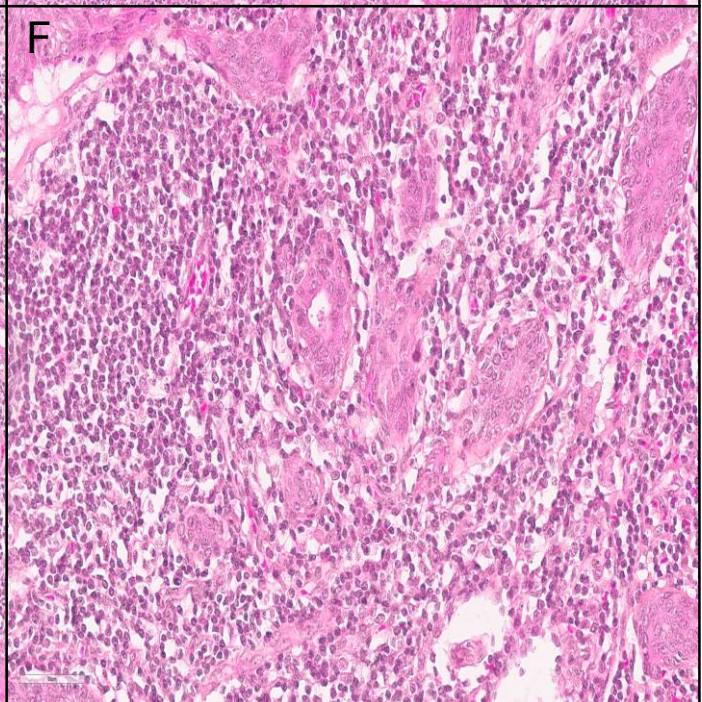

Supplement: MOESM2 [file 12105_2025_1872_MOESM2_ESM.pdf]
